# Supplementary material for: Estimating the value of tropical coastal wetland habitats to fisheries: Caveats and assumptions
Source: PLoS One. 2019 Apr 17;14(4):e0215350. doi: 10.1371/journal.pone.0215350 (PMC6469798; doi:10.1371/journal.pone.0215350)
Supplement: S1 Table — Data on Fenneropenaeus merguiensis captures (number and weight of prawns per net) for the downstream (DS), mid-estuary (MS) and upstream (US) reaches of Alligator Creek during each of the eleven trips. (XLSX) [file pone.0215350.s001.xlsx]

## Sheet: Prawn no. & weight
Trip	Reach	Net	Number of prawns	Weight (g)
1	DS	1	0	0
1	DS	2	0	0
1	DS	3	0	0
1	DS	4	3	4.07
1	DS	5	1	1.7
1	DS	6	0	0
1	DS	7	0	0
1	DS	8	0	0
1	DS	9	0	0
1	DS	10	0	0
1	DS	11	0	0
1	DS	12	7	5.66
1	DS	13	0	0
1	DS	14	0	0
1	DS	15	1	0.15
1	DS	16	1	0.09
1	DS	17	0	0
1	DS	18	0	0
1	DS	19	0	0
1	DS	20	0	0
1	DS	21	0	0
1	DS	22	0	0
1	DS	23	0	0
1	DS	24	0	0
1	DS	25	0	0
1	DS	26	0	0
1	DS	27	0	0
1	DS	28	0	0
1	DS	29	0	0
1	DS	30	0	0
1	MS	1	0	0
1	MS	2	0	0
1	MS	3	0	0
1	MS	4	0	0
1	MS	5	3	5.59
1	MS	6	1	2.53
1	MS	7	1	0.066
1	MS	8	1	1.24
1	MS	9	0	0
1	MS	10	4	1.69
1	MS	11	0	0
1	MS	12	0	0
1	MS	13	0	0
1	MS	14	0	0
1	MS	15	0	0
1	MS	16	0	0
1	MS	17	0	0
1	MS	18	0	0
1	MS	19	0	0
1	MS	20	0	0
1	MS	21	0	0
1	MS	22	0	0
1	MS	23	0	0
1	MS	24	0	0
1	MS	25	0	0
1	MS	26	0	0
1	MS	27	0	0
1	MS	28	0	0
1	MS	29	0	0
1	MS	30	0	0
1	US	1	0	0
1	US	2	0	0
1	US	3	0	0
1	US	4	0	0
1	US	5	0	0
1	US	6	0	0
1	US	7	0	0
1	US	8	0	0
1	US	9	0	0
1	US	10	0	0
1	US	11	0	0
1	US	12	0	0
1	US	13	0	0
1	US	14	0	0
1	US	15	0	0
1	US	16	0	0
1	US	17	1	0.4
1	US	18	0	0
1	US	19	0	0
1	US	20	3	1.47
1	US	21	1	0.57
1	US	22	0	0
1	US	23	0	0
1	US	24	0	0
1	US	25	0	0
1	US	26	0	0
1	US	27	0	0
1	US	28	0	0
1	US	29	0	0
1	US	30	0	0
2	DS	1	0	0
2	DS	2	0	0
2	DS	3	0	0
2	DS	4	0	0
2	DS	5	0	0
2	DS	6	0	0
2	DS	7	0	0
2	DS	8	0	0
2	DS	9	2	6.66
2	DS	10	4	0.5
2	DS	11	0	0
2	DS	12	6	10.81
2	DS	13	0	0
2	DS	14	0	0
2	DS	15	0	0
2	DS	16	0	0
2	DS	17	0	0
2	DS	18	0	0
2	DS	19	0	0
2	DS	20	0	0
2	DS	21	0	0
2	DS	22	0	0
2	DS	23	0	0
2	DS	24	0	0
2	DS	25	0	0
2	DS	26	0	0
2	DS	27	0	0
2	DS	28	0	0
2	DS	29	0	0
2	DS	30	0	0
2	MS	1	0	0
2	MS	2	4	8.19
2	MS	3	0	0
2	MS	4	0	0
2	MS	5	0	0
2	MS	6	0	0
2	MS	7	0	0
2	MS	8	4	6.9
2	MS	9	0	0
2	MS	10	0	0
2	MS	11	3	6.46
2	MS	12	8	6.81
2	MS	13	19	15.97
2	MS	14	0	0
2	MS	15	0	0
2	MS	16	0	0
2	MS	17	12	16.47
2	MS	18	0	0
2	MS	19	0	0
2	MS	20	1	0.23
2	MS	21	1	0.78
2	MS	22	3	7.79
2	MS	23	4	1.54
2	MS	24	4	4.26
2	MS	25	0	0
2	MS	26	0	0
2	MS	27	0	0
2	MS	28	0	0
2	MS	29	0	0
2	MS	30	0	0
2	US	1	0	0
2	US	2	0	0
2	US	3	0	0
2	US	4	0	0
2	US	5	0	0
2	US	6	0	0
2	US	7	0	0
2	US	8	1	4.17
2	US	9	0	0
2	US	10	0	0
2	US	11	0	0
2	US	12	0	0
2	US	13	0	0
2	US	14	0	0
2	US	15	0	0
2	US	16	4	5.62
2	US	17	2	1.81
2	US	18	2	0.42
2	US	19	0	0
2	US	20	0	0
2	US	21	14	10.96
2	US	22	5	7.24
2	US	23	0	0
2	US	24	0	0
2	US	25	0	0
2	US	26	0	0
2	US	27	0	0
2	US	28	0	0
2	US	29	0	0
2	US	30	0	0
3	DS	1	0	0
3	DS	2	14	29.17
3	DS	3	1	3.19
3	DS	4	0	0
3	DS	5	2	1.22
3	DS	6	0	0
3	DS	7	7	11
3	DS	8	35	40.98
3	DS	9	8	12.95
3	DS	10	23	31.66
3	DS	11	90	151.07
3	DS	12	0	0
3	DS	13	92	305.15
3	DS	14	1	1.46
3	DS	15	0	0
3	DS	16	0	0
3	DS	17	0	0
3	DS	18	0	0
3	DS	19	1	2.7
3	DS	20	0	0
3	DS	21	0	0
3	DS	22	0	0
3	DS	23	2	3.67
3	DS	24	0	0
3	DS	25	0	0
3	DS	26	0	0
3	DS	27	0	0
3	DS	28	0	0
3	DS	29	0	0
3	DS	30	0	0
3	MS	1	0	0
3	MS	2	0	0
3	MS	3	0	0
3	MS	4	0	0
3	MS	5	1	1.2
3	MS	6	0	0
3	MS	7	0	0
3	MS	8	0	0
3	MS	9	1	0.08
3	MS	10	0	0
3	MS	11	0	0
3	MS	12	0	0
3	MS	13	0	0
3	MS	14	0	0
3	MS	15	0	0
3	MS	16	0	0
3	MS	17	0	0
3	MS	18	0	0
3	MS	19	0	0
3	MS	20	0	0
3	MS	21	0	0
3	MS	22	0	0
3	MS	23	0	0
3	MS	24	0	0
3	MS	25	0	0
3	MS	26	0	0
3	MS	27	0	0
3	MS	28	0	0
3	MS	29	0	0
3	MS	30	0	0
3	US	1	0	0
3	US	2	0	0
3	US	3	0	0
3	US	4	0	0
3	US	5	0	0
3	US	6	0	0
3	US	7	0	0
3	US	8	1	3.1
3	US	9	0	0
3	US	10	0	0
3	US	11	0	0
3	US	12	0	0
3	US	13	0	0
3	US	14	0	0
3	US	15	0	0
3	US	16	0	0
3	US	17	0	0
3	US	18	0	0
3	US	19	0	0
3	US	20	0	0
3	US	21	0	0
3	US	22	0	0
3	US	23	0	0
3	US	24	0	0
3	US	25	0	0
3	US	26	0	0
3	US	27	0	0
3	US	28	0	0
3	US	29	0	0
3	US	30	0	0
4	DS	1	6	8.08
4	DS	2	14	33.35
4	DS	3	2	3.71
4	DS	4	40	35.78
4	DS	5	1	0.52
4	DS	6	0	0
4	DS	7	0	0
4	DS	8	12	37.39
4	DS	9	2	4.62
4	DS	10	1	5.72
4	DS	11	0	0
4	DS	12	0	0
4	DS	13	4	4.78
4	DS	14	0	0
4	DS	15	0	0
4	DS	16	0	0
4	DS	17	2	3.56
4	DS	18	0	0
4	DS	19	0	0
4	DS	20	0	0
4	DS	21	0	0
4	DS	22	0	0
4	DS	23	0	0
4	DS	24	0	0
4	DS	25	0	0
4	DS	26	0	0
4	DS	27	0	0
4	DS	28	0	0
4	DS	29	0	0
4	DS	30	0	0
4	MS	1	0	0
4	MS	2	0	0
4	MS	3	36	41.06
4	MS	4	73	95.77
4	MS	5	0	0
4	MS	6	0	0
4	MS	7	0	0
4	MS	8	0	0
4	MS	9	0	0
4	MS	10	0	0
4	MS	11	1	1.8
4	MS	12	0	0
4	MS	13	4	2.04
4	MS	14	13	11.15
4	MS	15	0	0
4	MS	16	3	2.25
4	MS	17	5	11.33
4	MS	18	0	0
4	MS	19	0	0
4	MS	20	0	0
4	MS	21	0	0
4	MS	22	0	0
4	MS	23	0	0
4	MS	24	0	0
4	MS	25	0	0
4	MS	26	0	0
4	MS	27	0	0
4	MS	28	0	0
4	MS	29	0	0
4	MS	30	0	0
4	US	1	2	3.92
4	US	2	0	0
4	US	3	0	0
4	US	4	0	0
4	US	5	3	1.68
4	US	6	7	6.11
4	US	7	1	0.66
4	US	8	0	0
4	US	9	0	0
4	US	10	0	0
4	US	11	0	0
4	US	12	1	1.38
4	US	13	0	0
4	US	14	0	0
4	US	15	0	0
4	US	16	0	0
4	US	17	9	9.09
4	US	18	0	0
4	US	19	0	0
4	US	20	0	0
4	US	21	0	0
4	US	22	0	0
4	US	23	0	0
4	US	24	0	0
4	US	25	0	0
4	US	26	0	0
4	US	27	0	0
4	US	28	0	0
4	US	29	0	0
4	US	30	0	0
5	DS	1	4	3.76
5	DS	2	0	0
5	DS	3	9	3.9
5	DS	4	5	5.87
5	DS	5	3	4.51
5	DS	6	12	12.41
5	DS	7	12	14.19
5	DS	8	4	9.78
5	DS	9	2	1.85
5	DS	10	0	0
5	DS	11	7	19.11
5	DS	12	0	0
5	DS	13	0	0
5	DS	14	0	0
5	DS	15	0	0
5	DS	16	0	0
5	DS	17	1	1.24
5	DS	18	0	0
5	DS	19	1	2.11
5	DS	20	0	0
5	DS	21	0	0
5	DS	22	0	0
5	DS	23	0	0
5	DS	24	0	0
5	DS	25	0	0
5	DS	26	0	0
5	DS	27	0	0
5	DS	28	0	0
5	DS	29	0	0
5	DS	30	0	0
5	MS	1	4	8.99
5	MS	2	2	4.28
5	MS	3	3	2.18
5	MS	4	14	14.21
5	MS	5	4	8.69
5	MS	6	0	0
5	MS	7	0	0
5	MS	8	0	0
5	MS	9	7	11.58
5	MS	10	10	15.25
5	MS	11	0	0
5	MS	12	8	11.44
5	MS	13	0	0
5	MS	14	2	4.1
5	MS	15	1	1.75
5	MS	16	3	3.12
5	MS	17	0	0
5	MS	18	0	0
5	MS	19	0	0
5	MS	20	0	0
5	MS	21	0	0
5	MS	22	0	0
5	MS	23	0	0
5	MS	24	0	0
5	MS	25	0	0
5	MS	26	0	0
5	MS	27	0	0
5	MS	28	0	0
5	MS	29	0	0
5	MS	30	0	0
5	US	1	0	0
5	US	2	0	0
5	US	3	0	0
5	US	4	0	0
5	US	5	0	0
5	US	6	0	0
5	US	7	0	0
5	US	8	0	0
5	US	9	0	0
5	US	10	0	0
5	US	11	0	0
5	US	12	0	0
5	US	13	0	0
5	US	14	12	18.18
5	US	15	5	7.83
5	US	16	0	0
5	US	17	0	0
5	US	18	0	0
5	US	19	0	0
5	US	20	0	0
5	US	21	0	0
5	US	22	0	0
5	US	23	0	0
5	US	24	0	0
5	US	25	0	0
5	US	26	0	0
5	US	27	0	0
5	US	28	0	0
5	US	29	0	0
5	US	30	0	0
6	DS	1	25	61.9
6	DS	2	11	48.81
6	DS	3	6	16.16
6	DS	4	8	7.5
6	DS	5	5	5.67
6	DS	6	3	5.04
6	DS	7	6	10.03
6	DS	8	8	3.66
6	DS	9	6	18.49
6	DS	10	24	62.81
6	DS	11	5	14.53
6	DS	12	9	46.19
6	DS	13	0	0
6	DS	14	0	0
6	DS	15	0	0
6	DS	16	1	4.2
6	DS	17	0	0
6	DS	18	1	1.46
6	DS	19	3	10.29
6	DS	20	2	4.11
6	DS	21	2	6.12
6	DS	22	1	0.82
6	DS	23	2	4.79
6	DS	24	0	0
6	DS	25	0	0
6	DS	26	0	0
6	DS	27	0	0
6	DS	28	21	59.14
6	DS	29	5	16.05
6	DS	30	0	0
6	MS	1	37	48.52
6	MS	2	3	2.83
6	MS	3	0	0
6	MS	4	0	0
6	MS	5	0	0
6	MS	6	0	0
6	MS	7	4	4.23
6	MS	8	0	0
6	MS	9	0	0
6	MS	10	0	0
6	MS	11	5	5.41
6	MS	12	0	0
6	MS	13	5	8.4
6	MS	14	0	0
6	MS	15	0	0
6	MS	16	0	0
6	MS	17	12	18.58
6	MS	18	0	0
6	MS	19	0	0
6	MS	20	0	0
6	MS	21	0	0
6	MS	22	0	0
6	MS	23	4	16.29
6	MS	24	0	0
6	MS	25	0	0
6	MS	26	0	0
6	MS	27	0	0
6	MS	28	0	0
6	MS	29	0	0
6	MS	30	0	0
6	US	1	0	0
6	US	2	0	0
6	US	3	0	0
6	US	4	0	0
6	US	5	0	0
6	US	6	1	2.94
6	US	7	0	0
6	US	8	0	0
6	US	9	0	0
6	US	10	0	0
6	US	11	0	0
6	US	12	0	0
6	US	13	0	0
6	US	14	0	0
6	US	15	0	0
6	US	16	0	0
6	US	17	0	0
6	US	18	0	0
6	US	19	0	0
6	US	20	0	0
6	US	21	0	0
6	US	22	0	0
6	US	23	0	0
6	US	24	0	0
6	US	25	0	0
6	US	26	0	0
6	US	27	0	0
6	US	28	0	0
6	US	29	0	0
6	US	30	0	0
7	DS	1	62	195.21
7	DS	2	6	8.45
7	DS	3	15	50.63
7	DS	4	41	120.9
7	DS	5	26	53.34
7	DS	6	5	17.86
7	DS	7	6	17.75
7	DS	8	0	0
7	DS	9	0	0
7	DS	10	4	11.15
7	DS	11	0	0
7	DS	12	0	0
7	DS	13	0	0
7	DS	14	0	0
7	DS	15	0	0
7	DS	16	0	0
7	DS	17	0	0
7	DS	18	0	0
7	DS	19	0	0
7	DS	20	0	0
7	DS	21	0	0
7	DS	22	0	0
7	DS	23	61	186.36
7	DS	24	0	0
7	DS	25	0	0
7	DS	26	0	0
7	DS	27	0	0
7	DS	28	0	0
7	DS	29	0	0
7	DS	30	0	0
7	MS	1	0	0
7	MS	2	0	0
7	MS	3	0	0
7	MS	4	0	0
7	MS	5	0	0
7	MS	6	0	0
7	MS	7	1	0.87
7	MS	8	15	16.77
7	MS	9	0	0
7	MS	10	0	0
7	MS	11	0	0
7	MS	12	0	0
7	MS	13	2	2.95
7	MS	14	0	0
7	MS	15	0	0
7	MS	16	37	75.31
7	MS	17	0	0
7	MS	18	0	0
7	MS	19	0	0
7	MS	20	4	13.06
7	MS	21	2	1.84
7	MS	22	0	0
7	MS	23	0	0
7	MS	24	6	13.69
7	MS	25	6	18.13
7	MS	26	0	0
7	MS	27	0	0
7	MS	28	0	0
7	MS	29	0	0
7	MS	30	0	0
7	US	1	1	0.8
7	US	2	0	0
7	US	3	0	0
7	US	4	0	0
7	US	5	0	0
7	US	6	0	0
7	US	7	0	0
7	US	8	0	0
7	US	9	0	0
7	US	10	0	0
7	US	11	0	0
7	US	12	0	0
7	US	13	1	2.02
7	US	14	0	0
7	US	15	1	1.88
7	US	16	0	0
7	US	17	0	0
7	US	18	0	0
7	US	19	0	0
7	US	20	0	0
7	US	21	0	0
7	US	22	0	0
7	US	23	0	0
7	US	24	0	0
7	US	25	0	0
7	US	26	0	0
7	US	27	0	0
7	US	28	0	0
7	US	29	0	0
7	US	30	0	0
8	DS	1	22	51.5
8	DS	2	9	34.01
8	DS	3	57	62.24
8	DS	4	25	47.73
8	DS	5	30	14.48
8	DS	6	26	39.6
8	DS	7	11	58.08
8	DS	8	46	239.76
8	DS	9	121	568.08
8	DS	10	98	604.24
8	DS	11	14	41.25
8	DS	12	6	18.02
8	DS	13	16	92.63
8	DS	14	2	12.08
8	DS	15	0	0
8	DS	16	66	396.96
8	DS	17	0	0
8	DS	18	0	0
8	DS	19	1	7.03
8	DS	20	17	102.54
8	DS	21	0	0
8	DS	22	0	0
8	DS	23	0	0
8	DS	24	0	0
8	DS	25	1	3.67
8	DS	26	0	0
8	DS	27	0	0
8	DS	28	0	0
8	DS	29	0	0
8	DS	30	0	0
8	MS	1	0	0
8	MS	2	3	4.31
8	MS	3	3	3.01
8	MS	4	7	2.87
8	MS	5	0	0
8	MS	6	0	0
8	MS	7	12	21.55
8	MS	8	0	0
8	MS	9	0	0
8	MS	10	0	0
8	MS	11	0	0
8	MS	12	1	3.67
8	MS	13	7	15.3
8	MS	14	0	0
8	MS	15	0	0
8	MS	16	0	0
8	MS	17	2	4.62
8	MS	18	29	12.01
8	MS	19	0	0
8	MS	20	0	0
8	MS	21	21	60.6
8	MS	22	1	5.24
8	MS	23	0	0
8	MS	24	0	0
8	MS	25	0	0
8	MS	26	0	0
8	MS	27	0	0
8	MS	28	0	0
8	MS	29	0	0
8	MS	30	0	0
8	US	1	0	0
8	US	2	0	0
8	US	3	1	1.29
8	US	4	1	0.22
8	US	5	4	0.54
8	US	6	4	1.55
8	US	7	0	0
8	US	8	5	2.64
8	US	9	9	1.71
8	US	10	2	0.5
8	US	11	97	36.99
8	US	12	10	3.59
8	US	13	1	0.34
8	US	14	0	0
8	US	15	0	0
8	US	16	0	0
8	US	17	0	0
8	US	18	1	0.21
8	US	19	0	0
8	US	20	0	0
8	US	21	1	0.33
8	US	22	18	12.72
8	US	23	26	22.78
8	US	24	1	0.48
8	US	25	0	0
8	US	26	0	0
8	US	27	0	0
8	US	28	0	0
8	US	29	0	0
8	US	30	0	0
9	DS	1	12	13.17
9	DS	2	23	29.11
9	DS	3	87	147.28
9	DS	4	1	1.57
9	DS	5	42	155.17
9	DS	6	1	8.45
9	DS	7	5	3.5
9	DS	8	3	12.25
9	DS	9	2	0.74
9	DS	10	2	9.12
9	DS	11	41	28.23
9	DS	12	0	0
9	DS	13	185	475.62
9	DS	14	0	0
9	DS	15	0	0
9	MS	1	7	7.58
9	MS	2	8	5.62
9	MS	3	2	2.77
9	MS	4	4	3.93
9	MS	5	0	0
9	MS	6	0	0
9	MS	7	1	0.38
9	MS	8	0	0
9	MS	9	21	9.87
9	MS	10	39	16.61
9	MS	11	6	5.17
9	MS	12	7	10.14
9	MS	13	0	0
9	MS	14	0	0
9	MS	15	0	0
9	US	1	0	0
9	US	2	0	0
9	US	3	0	0
9	US	4	0	0
9	US	5	14	8.91
9	US	6	0	0
9	US	7	1	0.67
9	US	8	1	0.47
9	US	9	8	5.67
9	US	10	18	14.19
9	US	11	0	0
9	US	12	4	2.01
9	US	13	0	0
9	US	14	0	0
9	US	15	0	0
10	DS	1	19	60.57
10	DS	2	4	4.68
10	DS	3	40	123.05
10	DS	4	30	52.17
10	DS	5	7	6.51
10	DS	6	0	0
10	DS	7	22	23.43
10	DS	8	9	12.86
10	DS	9	1	0.83
10	DS	10	86	484.25
10	DS	11	0	0
10	DS	12	0	0
10	DS	13	0	0
10	DS	14	0	0
10	DS	15	0	0
10	DS	16	0	0
10	DS	17	0	0
10	DS	18	0	0
10	DS	19	0	0
10	DS	20	0	0
10	MS	1	23	12.09
10	MS	2	0	0
10	MS	3	42	19.58
10	MS	4	3	2.43
10	MS	5	1	0.46
10	MS	6	18	9.62
10	MS	7	11	8.59
10	MS	8	0	0
10	MS	9	1	0.7
10	MS	10	2	0.59
10	MS	11	1	1.28
10	MS	12	33	17.49
10	MS	13	16	13.48
10	MS	14	26	20.38
10	MS	15	134	134.08
10	MS	16	4	1.21
10	MS	17	70	52.33
10	MS	18	2	1.97
10	MS	19	0	0
10	MS	20	0	0
10	US	1	0	0
10	US	2	0	0
10	US	3	0	0
10	US	4	0	0
10	US	5	0	0
10	US	6	0	0
10	US	7	0	0
10	US	8	0	0
10	US	9	0	0
10	US	10	0	0
10	US	11	0	0
10	US	12	0	0
10	US	13	0	0
10	US	14	0	0
10	US	15	0	0
10	US	16	1	0.55
10	US	17	0	0
10	US	18	0	0
10	US	19	0	0
10	US	20	0	0
11	DS	1	1	8.52
11	DS	2	0	0
11	DS	3	3	10.92
11	DS	4	7	51.99
11	DS	5	6	4.05
11	DS	6	2	1.63
11	DS	7	5	29.71
11	DS	8	1	10.19
11	DS	9	4	31.43
11	DS	10	0	0
11	DS	11	0	0
11	DS	12	0	0
11	DS	13	2	14.2
11	DS	14	0	0
11	DS	15	47	222.42
11	DS	16	0	0
11	DS	17	0	0
11	DS	18	0	0
11	DS	19	0	0
11	DS	20	0	0
11	DS	21	0	0
11	DS	22	0	0
11	DS	23	25	134.71
11	DS	24	1	5.07
11	DS	25	0	0
11	DS	26	0	0
11	DS	27	0	0
11	DS	28	0	0
11	DS	29	0	0
11	DS	30	0	0
11	MS	1	7	7.24
11	MS	2	1	1.13
11	MS	3	2	2.71
11	MS	4	8	4.34
11	MS	5	19	11.15
11	MS	6	0	0
11	MS	7	2	1.01
11	MS	8	11	5.17
11	MS	9	1	2.73
11	MS	10	0	0
11	MS	11	0	0
11	MS	12	1	0.34
11	MS	13	2	2.6
11	MS	14	59	38.58
11	MS	15	0	0
11	MS	16	11	15.15
11	MS	17	0	0
11	MS	18	0	0
11	MS	19	2	1.04
11	MS	20	0	0
11	MS	21	3	3.13
11	MS	22	4	6.84
11	MS	23	0	0
11	MS	24	0	0
11	MS	25	0	0
11	MS	26	0	0
11	MS	27	0	0
11	MS	28	0	0
11	MS	29	0	0
11	MS	30	0	0
11	US	1	0	0
11	US	2	0	0
11	US	3	0	0
11	US	4	0	0
11	US	5	0	0
11	US	6	0	0
11	US	7	0	0
11	US	8	0	0
11	US	9	1	0.8
11	US	10	1	0.24
11	US	11	0	0
11	US	12	2	1.63
11	US	13	0	0
11	US	14	0	0
11	US	15	0	0
11	US	16	3	3.7
11	US	17	0	0
11	US	18	1	1.13
11	US	19	3	5.67
11	US	20	0	0
11	US	21	6	5.9
11	US	22	12	10.43
11	US	23	0	0
11	US	24	0	0
11	US	25	0	0
11	US	26	0	0
11	US	27	0	0
11	US	28	0	0
11	US	29	0	0
11	US	30	0	0
