# Supplementary material for: Estimating the value of tropical coastal wetland habitats to fisheries: Caveats and assumptions
Source: PLoS One. 2019 Apr 17;14(4):e0215350. doi: 10.1371/journal.pone.0215350 (PMC6469798; doi:10.1371/journal.pone.0215350)
Supplement: S2 Table — Fenneropenaeus merguiensis size structure for each trip (T1-T11) for the downstream (DS), mid-estuary (MS) and upstream (US) reaches of Alligator Creek. Data was binned into 5 mm size classes. (XLSX) [file pone.0215350.s002.xlsx]

## Sheet: Size Structure
Size (mm; Bined)	T1 DS	T1 MS	T1 US	T2 DS	T2 MS	T2 US	T3 DS	T3 MS	T3 US	T4 DS	T4 MS	T4 US	T5 DS	T5 MS	T5 US	T6 DS	T6 MS	T6 US	T7 DS	T7 MS	T7 US	T8 DS	T8 MS	T8 US	T9 DS	T9 MS	T9 US	T10 DS	T10 MS	T10 US	T11 DS	T11 MS	T11 US
10	0	0	0	0	0	0	0	0	0	0	0	0	0	0	0	0	0	0	0	0	0	0	0	0	0	0	0	0	0		0	0	0
15	0	0	0	0	0	0	0	0	0	0	0	0	0	0	0	0	0	0	0	0	0	0	0	0	0	0	0	0	0	0	0	0	0
20	0	0	0	0	0	0	0	1	0	0	0	0	1	0	0	0	0	0	0	0	0	0	0	2	0	0	0	0	0	0	0	0	0
25	0	1	0	0	1	0	0	0	0	0	0	0	0	0	0	0	0	0	1	0	0	1	0	0	0	0	1	0	0	0	0	0	0
30	1	0	0	2	1	0	0	0	0	0	0	0	1	0	0	0	0	0	0	1	0	3	1	3	0	0	1	0	5	0	0	0	0
35	1	0	0	2	2	0	2	0	0	0	0	0	3	0	0	0	0	0	0	0	0	5	2	12	2	0	0	0	8	0	0	4	0
40	2	1	0	0	15	7	6	0	0	0	1	1	1	2	0	1	0	0	1	0	0	41	8	39	16	7	1	4	38	0	0	5	2
45	1	2	0	1	12	1	16	0	0	5	8	0	6	4	0	4	0	0	2	0	0	39	17	72	43	29	5	8	62	0	2	17	1
50	1	1	5	2	3	1	13	0	0	12	9	6	12	2	0	5	2	0	1	0	0	26	10	25	28	21	17	5	58	1	1	22	6
55	2	0	0	1	2	2	11	0	0	11	26	4	6	4	1	7	2	0	1	0	1	23	3	4	41	15	8	11	62	0	5	39	2
60	0	0	0	1	6	4	9	0	0	14	31	3	5	10	4	10	10	0	5	8	0	8	3	6	40	6	5	20	57	0	4	12	5
65	1	2	0	0	6	2	23	0	0	5	27	2	6	10	3	13	19	0	8	10	0	5	4	8	32	5	3	19	40	0	6	14	5
70	1	0	0	0	2	3	29	0	0	3	7	3	3	5	3	13	13	0	13	10	0	2	4	3	47	6	4	13	24	0	2	7	3
75	1	1	0	0	2	6	43	0	1	5	5	1	2	6	3	20	10	0	18	8	2	5	2	1	37	3	1	7	14	0	2	6	3
80	1	1	0	0	1	1	38	0	0	5	5	2	4	4	1	11	7	1	28	14	0	7	2	0	21	3	0	6	7	0	3	5	1
85	1	1	0	0	2	0	35	0	0	8	2	0	3	2	0	9	4	0	38	8	0	19	12	2	9	0	0	6	4	0	4	1	0
90	0	0	0	1	3	0	18	0	0	7	6	1	3	5	1	13	1	0	32	7	0	21	9	1	15	0	0	8	2	0	8	0	0
95	0	0	0	1	0	1	5	0	0	4	2	0	1	2	0	12	1	0	39	4	0	44	5	2	11	0	0	19	4	0	3	0	1
100	0	0	0	0	2	0	11	0	0	2	5	0	2	2	1	18	0	0	20	3	0	59	4	1	8	0	0	18	2	0	8	1	0
105	0	0	0	0	3	0	6	0	0	2	1	0	0	0	0	7	0	0	13	0	0	91	0	0	8	0	0	31	0	0	15	0	0
110	0	0	0	0	0	0	2	0	0	1	0	0	1	0	0	10	0	0	5	0	0	78	0	0	9	0	0	23	0	0	11	0	0
115	0	0	0	1	0	0	4	0	0	0	0	0	0	0	0	0	0	0	1	0	0	61	0	0	15	0	0	14	0	0	14	0	0
120	0	0	0	0	0	0	3	1	0	0	0	0	0	0	0	0	0	0	0	0	0	22	0	0	10	0	0	5	0	0	12	0	0
125	0	0	0	0	0	0	2	0	0	0	0	0	0	0	0	1	1	0	0	0	0	6	0	0	7	0	0	1	0	0	4	0	0
130	0	0	0	0	0	0	0	0	0	0	0	0	0	0	0	0	0	0	0	0	0	1	0	0	5	0	0	0	0	0	0	0	0
