# Supplementary material for: Estimating the value of tropical coastal wetland habitats to fisheries: Caveats and assumptions
Source: PLoS One. 2019 Apr 17;14(4):e0215350. doi: 10.1371/journal.pone.0215350 (PMC6469798; doi:10.1371/journal.pone.0215350)
Supplement: S3 Table — Carbon (δ13C) and nitrogen (δ15N). (XLSX) [file pone.0215350.s003.xlsx]

## Sheet: Stable Isotope data
Site	Organism	d13C	d15N	d13C SD	d15N SD
Ross River - Mangrove Pool	Mangroves	-27.3	5.8	1.1	1.2
Ross River - Mangrove Pool	Saltmarsh	-16.2	4.8	0.3	0.3
Ross River - Mangrove Pool	Epiliths	-15.9	3.1	0.2	0.2
Ross River - Mangrove Pool	Epiphytes	-22.3	4.4	0.2	0.2
Ross River - Mangrove Pool	MPB	-16.5	2.9	0.3	0.3
Ross River - Mangrove Pool	Plankton	-19.1	1.4	0.2	0.2
Ross River - Mangrove Pool	F. merguiensis	-15.9	6.3
Ross River - Mangrove Pool	F. merguiensis	-15.3	6.6
Ross River - Mangrove Pool	F. merguiensis	-16	7.9
Ross River - Saltmarsh Pool	Mangroves	-27.3	5.8	1.1	1.2
Ross River - Saltmarsh Pool	Saltmarsh	-16.2	4.8	0.3	0.3
Ross River - Saltmarsh Pool	Epiliths	-15.9	3.1	0.2	0.2
Ross River - Saltmarsh Pool	Epiphytes	-22.3	4.4	0.2	0.2
Ross River - Saltmarsh Pool	MPB	-16.5	2.9	0.3	0.3
Ross River - Saltmarsh Pool	Plankton	-19.1	1.4	0.2	0.2
Ross River - Saltmarsh Pool	F. merguiensis	-15.9	6.3
Ross River - Saltmarsh Pool	F. merguiensis	-15.3	6.6
Ross River - Saltmarsh Pool	F. merguiensis	-16	7.9
Deluge	Mangroves	-29	2.6	0.5	0.5
Deluge	Saltmarsh	-18.3	2.4	0.5	0.5
Deluge	MPB	-22.8	2.9	0.3	1.2
Deluge	Plankton	-20	7.6	0.5	0.5
Deluge	F. merguiensis	-20.4	8.3
Deluge	F. merguiensis	-17.5	7.3
Deluge	F. merguiensis	-20.8	8
Deluge	F. merguiensis	-20.7	7.9
Deluge	F. merguiensis	-18.8	5.5
Deluge	F. merguiensis	-17.5	6
Deluge	F. merguiensis	-20.2	6.1
Cocoa Ck	Mangroves	-27		0.5
Cocoa Ck	Saltmarsh	-12		0.5
Cocoa Ck	MPB	-14		0.5
Cocoa Ck	Plankton	-20.5		0.5
Cocoa Ck	Seagrass	-11.5		0.5
Cocoa Ck	F. merguiensis	-21.3
Cocoa Ck	F. merguiensis	-19.3
Cocoa Ck	F. merguiensis	-19.3
Doughboy Creek	Mangroves	-27		0.5
Doughboy Creek	Saltmarsh	-12		0.5
Doughboy Creek	MPB	-14		0.5
Doughboy Creek	Plankton	-20.5		0.5
Doughboy Creek	F. merguiensis	-20		0.5
Doughboy Creek	F. merguiensis	-22.4
Doughboy Creek	F. merguiensis	-21.9
